# Supplementary material
Source: publisher figshare collection journal article supplement (https://sage.figshare.com/ndownloader/files/18598928)

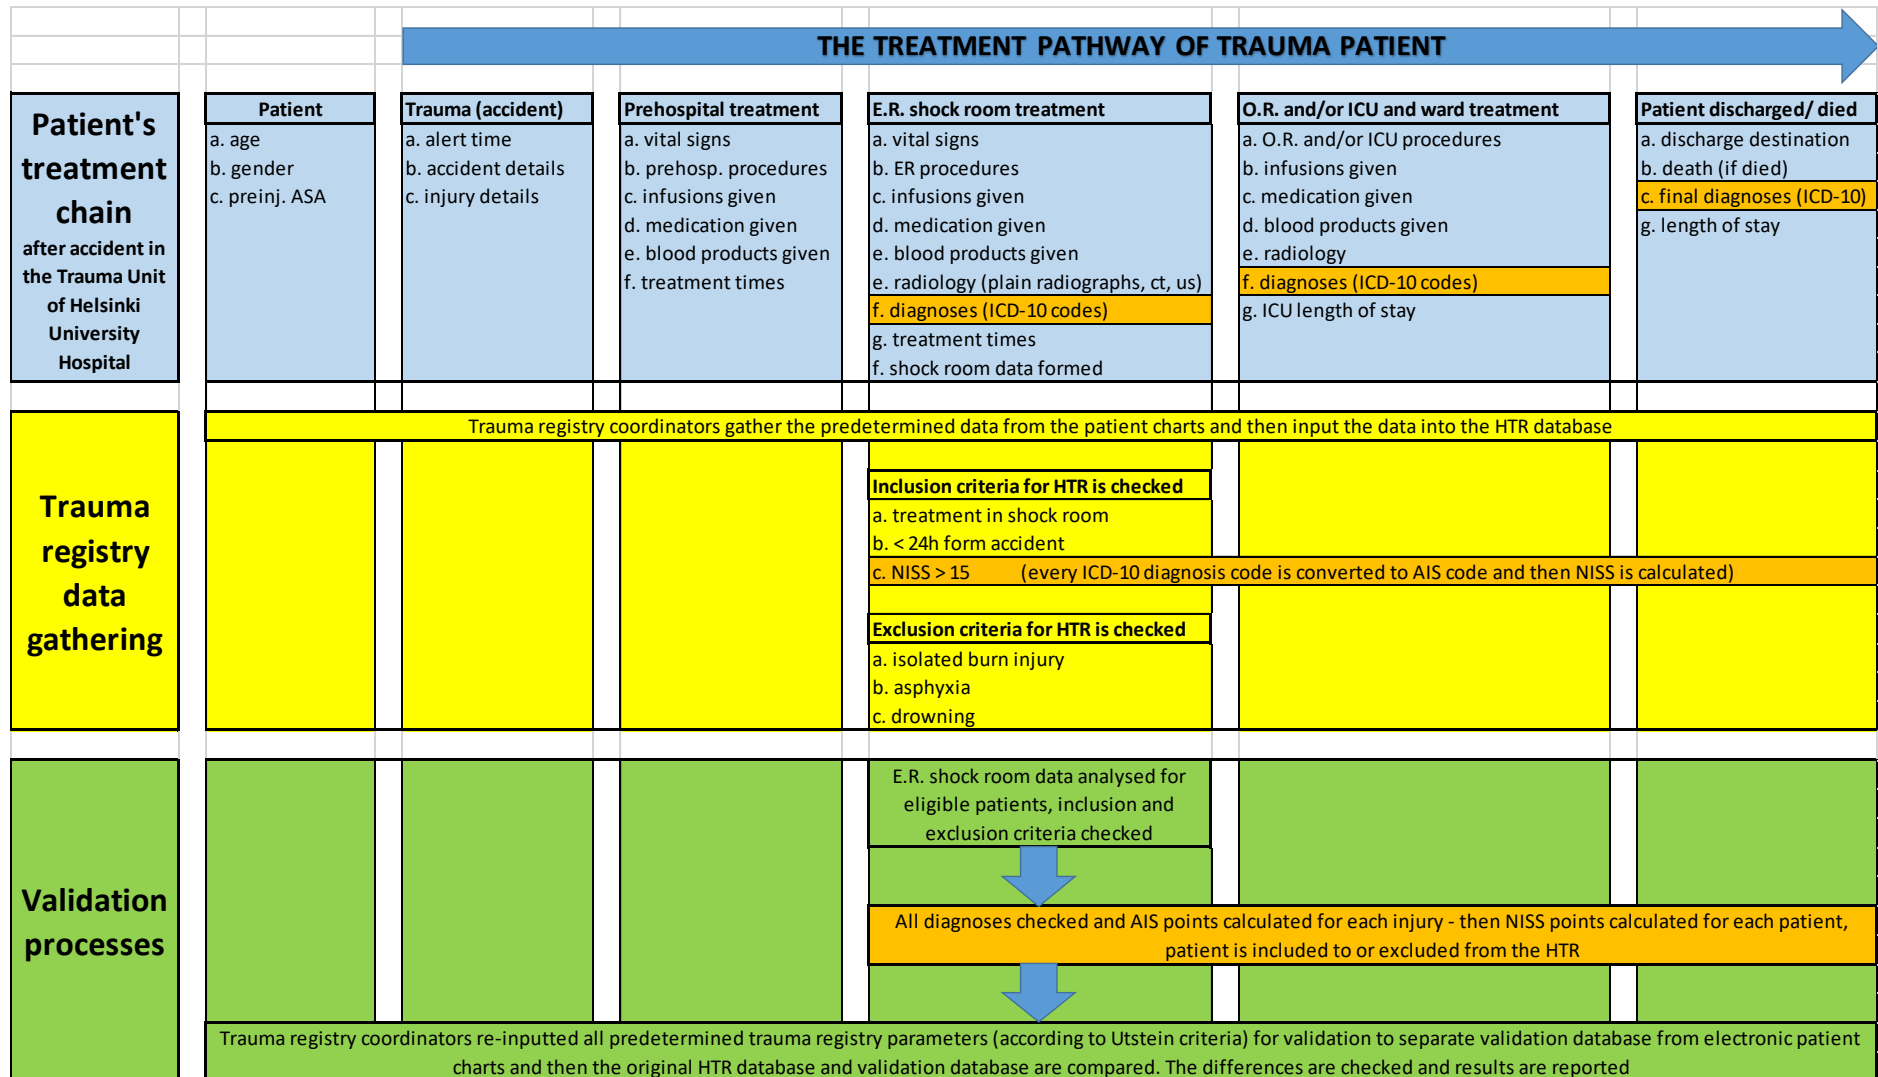

Supplement: Supplementary file 1 [file 18598928]
